# Supplementary material for: Glutathionylation of dengue and Zika NS5 proteins affects guanylyltransferase and RNA dependent RNA polymerase activities
Source: PubMed Central journal article supplement (PMC5823458; doi:10.1371/journal.pone.0193133), 2018-02-22
Supplement: pone.0193133.s002.pdf [file pone.0193133.s002.pdf]

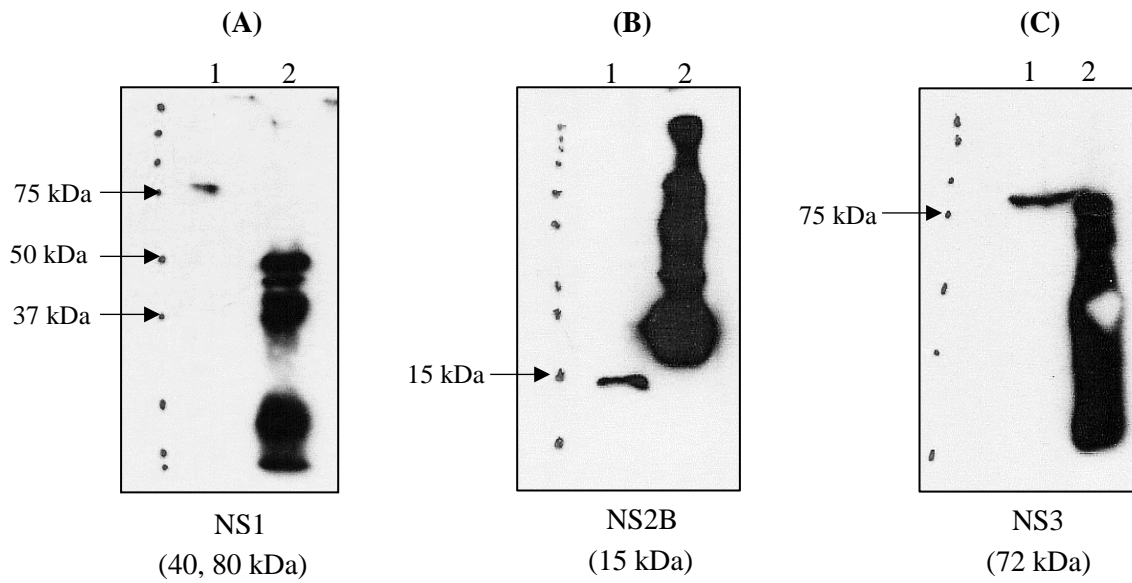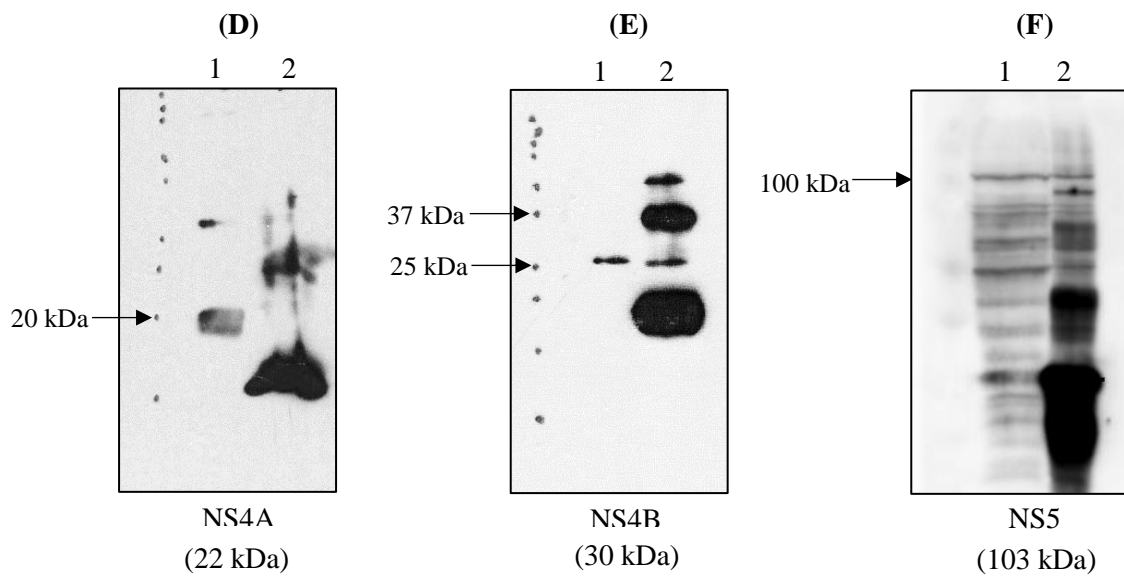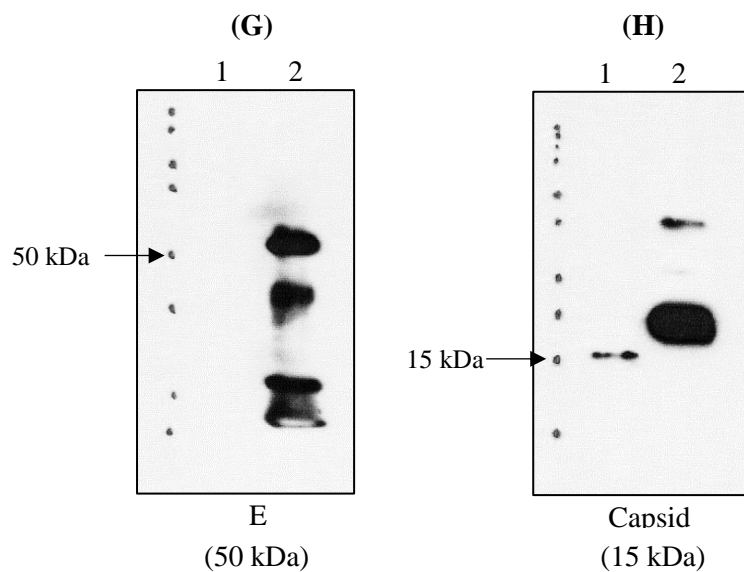

**S2 Fig. Immunoprecipitation results of the first method.** The first method was to immunoprecipitate the glutathionylated proteins in cell lysate with protein A/G beads and determine that dengue proteins were immunoprecipitated by detection with specific anti-dengue antibodies. Lane 1 is DENV-infected cell lysate. Lane 2 is IP sample.
