# Supplementary material for: Glutathionylation of dengue and Zika NS5 proteins affects guanylyltransferase and RNA dependent RNA polymerase activities
Source: PubMed Central journal article supplement (PMC5823458; doi:10.1371/journal.pone.0193133), 2018-02-22
Supplement: pone.0193133.s004.pdf [file pone.0193133.s004.pdf]

### A Time course of GTP hydrolysis

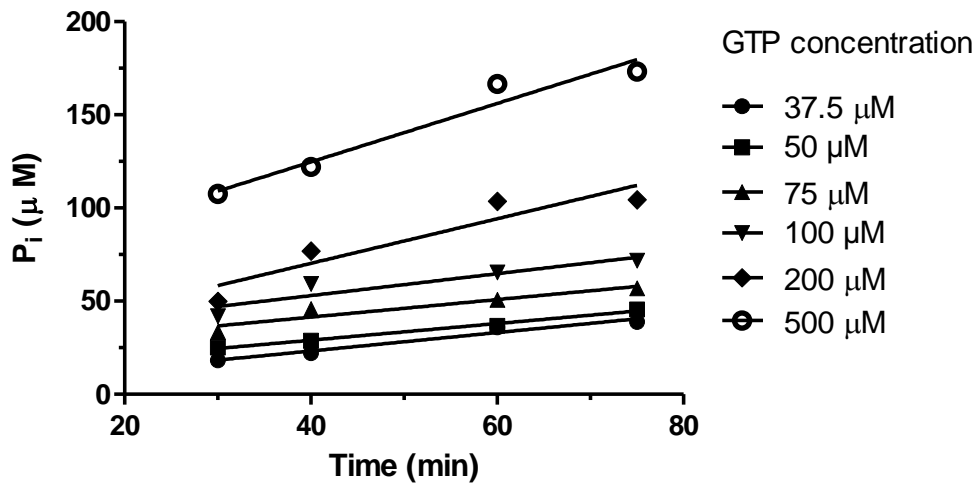

### B V / S

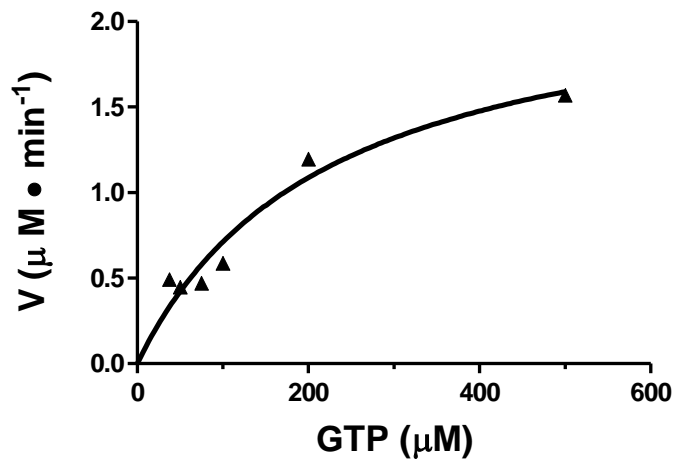

**S4 Fig. A typical experimental determination of kinetic parameters for RdRp activity of NS5.** A) An example of the time course for GTP hydrolysis to determine steady state kinetics. B) The enzyme rates (slopes) from the time course plots versus GTP concentrations. This is a V versus S plot with the kinetic parameter values generated by non-linear regression of this secondary plot. The plots were generated by GraphPad Prism version 5.04.
